# Supplementary material
Source: publisher figshare collection journal article supplement (https://springernature.figshare.com/ndownloader/files/22008729)
Supplement: Supplementary file [file 22008729]

## Additional file 2 Search syntax for electronic databases

| Sources searched | Search strategy used, including any limits                                                                                                                                                                                                                                                                                                                                                                                                                                                                                                                                                                                                                                                                                   |
|------------------|------------------------------------------------------------------------------------------------------------------------------------------------------------------------------------------------------------------------------------------------------------------------------------------------------------------------------------------------------------------------------------------------------------------------------------------------------------------------------------------------------------------------------------------------------------------------------------------------------------------------------------------------------------------------------------------------------------------------------|
| PubMed           | <p><i>(All fields)</i> "walk* program*" OR "walk* intervention" OR "health walk*" OR "walk* group*" OR "walk* club*" OR "lay led walk*" OR "community based walk*" OR "community walk*" OR "walk* scheme*" OR "walk* for health" OR "group physical activity" OR "walking in groups" OR "group walk*" OR "led walk" OR "group exercise"</p> <p><b>Filters:</b> humans; 01/01/2012 to date; adults: 19+ years; English language</p>                                                                                                                                                                                                                                                                                           |
| Sport Discus     | <p><i>All fields</i>) "walk* program*" OR "walk* intervention" OR "health walk*" OR "walk* group*" OR "walk* club*" OR "lay led walk*" OR "community based walk*" OR "community walk*" OR "walk* scheme*" OR "walk* for health" OR "group physical activity" OR "walking in groups" OR "group walk*" OR "led walk" OR "group exercise"</p> <p><i>(Title)</i> NOT "Parkinson*" NOT "multiple sclerosis" NOT "gait"</p> <p><b>Filters:</b> January 2012 to date; English language</p>                                                                                                                                                                                                                                          |
| Cochrane Library | <p><i>(All fields)</i> "walk* program*" OR "walk* intervention" OR "health walk*" OR "walk* group*" OR "walk* club*" OR "lay led walk*" OR "community based walk*" OR "community walk*" OR "walk* scheme*" OR "walk* for health" OR "group physical activity" OR "walking in groups" OR "group walk*" OR "led walk" OR "group exercise"</p> <p><i>(Title, abstract, keywords)</i> NOT "Parkinson*" NOT "multiple sclerosis" NOT "gait"</p> <p><b>Limits:</b> 2012 to 2017</p>                                                                                                                                                                                                                                                |
| EMBASE           | <p><i>All fields</i>) 'walk* program*' OR 'walk* intervention' OR 'health walk*' OR 'walk* group*' OR 'walk* club*' OR 'lay led walk*' OR 'community based walk*' OR 'community walk*' OR 'walk* scheme*' OR 'walk* for health' OR 'group physical activity' OR 'walking in groups' OR 'group walk*' OR 'led walk' OR 'group exercise'</p> <p><i>(Title)</i> NOT 'Parkinson*' OR 'multiple sclerosis' OR 'gait'</p> <p><i>(Abstract)</i> NOT 'Parkinson*' OR 'multiple sclerosis' OR 'gait'</p> <p><i>(Keywords)</i> NOT 'Parkinson*' OR 'multiple sclerosis' OR 'gait'</p> <p><b>Limits:</b> Humans; 2012 to current; English language; Adult &lt;18 to 64 years&gt;; Adult &lt;65 years +; Conference abstracts/Embase</p> |
| PsycINFO         | <p>"walk* program*" OR "walk* intervention" OR "health walk*" OR "walk* group*" OR "walk* club*" OR "lay led walk*" OR "community based walk*" OR "community walk*" OR "walk* scheme*" OR "walk* for health" OR "group physical activity" OR "walking in groups" OR "group walk*" OR "led walk" OR "group exercise"</p> <p><i>(Title, abstract, keywords)</i> NOT "Parkinson*" OR "multiple sclerosis" OR "gait"</p> <p><b>Limits:</b> Publication date Jan 2012 to July 2017; adulthood (18 yrs &amp; older); human; English language</p>                                                                                                                                                                                   |
